# Supplementary material
Source: HighWire-hosted journal article supplement (https://bmjopenquality.bmj.com/content/6/2/e000017)
Supplement: inline-supplementary-material-1 [file inline-supplementary-material-1.pdf]

Figure 1. Likert-scale questionnaire with free text for suggestions.

**QIP- Improving the quality of MRCP orientated teaching in UHCW NHS Trust**

Dr P. Jellicoe, Dr T. Roper, Dr N. Murphy

Pre intervention trainee questionnaire

*This survey is designed to assess the current teaching programme and its delivery over the last 12 months in order to target areas for improvement. Please circle the appropriate response for each q.*

Q1: Current training level: **CMT1** **CMT2** **ST3+**

Q2: What is your current progress in the MRCP exam series?

**No parts passed** **Passed Part 1** **Passed Part 2** **Passed PACES**

Q3: Number of attempts for each exam

Part 1: **1 attempt** **2 attempts** **3 attempts** **>3 attempts**

Part 2: **1 attempt** **2 attempts** **3 attempts** **>3 attempts**

PACES: **1 attempt** **2 attempts** **3 attempts** **>3 attempts**

Q4: How easy was it for you to arrange study leave for exams?

**Very easy** **Easy** **Fair** **Difficult** **Very Difficult** **IIA**

Q5: How would you rate the relevance of the CMT teaching to the MRCP written exams over the last 12 months?

**Very Good** **Good** **Average** **Poor**

Q6: How would you rate the relevance of the CMT teaching to the MRCP PACES exam over the last 12 months?

**Very Good** **Good** **Average** **Poor** **IIA**

Q7: How would you rate your exposure to ward based PACES teaching/ feedback?

**Very Good** **Good** **Average** **Poor**

Q8: How would you rate the overall quality of ward based PACES teaching/ feedback?

**Very Good** **Good** **Average** **Poor** **IIA**

Q9: How many organised PACES teaching sessions did you attend in the last 12 months?

**None** **1-3** **4-6** **7-9** **10+**

Free Text / Suggestions
